# Supplementary material for: FFF-based high-throughput sequence shortlisting to support the development of aptamer-based analytical strategies
Source: Springer Nature journal article supplement (doi:10.1007/s00216-022-03971-2), 2022-02-18
Supplement: MOESM1 [file 216_2022_3971_MOESM1_ESM.pdf]

Supplementary Information for:

**FFF-based high-throughput sequence shortlisting to support the development of aptamer-based analytical strategies**

Valentina Marassi<sup>1,2\*</sup>, Monica Mattarozzi<sup>3\*</sup>, Lorenzo Toma<sup>3</sup>, Stefano Giordani<sup>1</sup>, Luca Ronda<sup>4,5</sup>, Barbara Roda<sup>1,2</sup>, Andrea Zattoni<sup>1,2</sup>, Pierluigi Reschiglian<sup>1,2</sup>, Maria Careri<sup>3</sup>

valentina.marassi2@unibo.it; monica.mattarozzi@unipr.it

<sup>1</sup> Department of Chemistry, University of Bologna, Via Selmi 2, Bologna, Italy

<sup>2</sup> byFlow srl, Bologna, Italy

<sup>3</sup> Department of Chemistry, Life Sciences and Environmental Sustainability, University of Parma, Parco Area delle Scienze 17/A, 43124, Parma, Italy

<sup>4</sup> Department of Medicine and Surgery, University of Parma, Parco Area delle Scienze, 23/A, 43124, Parma, Italy

<sup>5</sup> Institute of Biophysics, CNR, 56124 Pisa, Italy

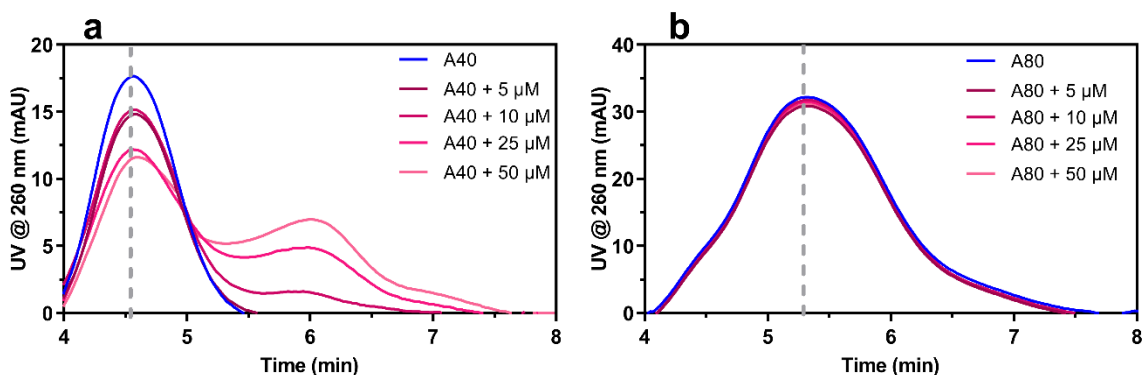

**Fig. S1** AF4-UV fractograms of (a) A40 and (b) A80 and their mixtures with BSA, dashed line: retention time at which signal intensity is recorded to evaluate the signal decrease of free aptamer, correlated to the formation of a complex.
